# Supplementary material
Source: ML conference proceedings conference paper supplement (https://openaccess.thecvf.com/content/CVPR2024/html/Chen_Building_a_Strong_CVPR_2024_paper.html)
Supplement: Supplementary file 1 [file Chen_Building_a_Strong_CVPR_2024_supplemental.pdf]

# Building a Strong Pre-Training Baseline for Universal 3D Large-Scale Perception

## Supplementary Material

|     |                                                          |   |
|-----|----------------------------------------------------------|---|
| 001 | <b>Contents</b>                                          |   |
| 002 | <b>A Implementation Details</b>                          | 1 |
| 003 | A.1 Semantic Segmentation and Object Detection           | 1 |
| 004 | A.2 Panoptic Segmentation by Cylinder3D . . . . .        | 1 |
| 005 | <b>B Complementary Results</b>                           | 1 |
| 006 | B.1. Semantic segmentation result of 1% labels . . . . . | 1 |
| 007 | B.2. More Image-LIDAR Datasets. . . . .                  | 2 |
| 008 | B.3. More Ablation Study . . . . .                       | 2 |
| 009 | B.4. 2D/3D Prototype Generation . . . . .                | 3 |
| 010 | B.5. Semantic Distribution of superpixel . . . . .       | 4 |
| 011 | <b>C Public Resources Used</b>                           | 4 |

### 012 A. Implementation Details

013 **Pre-training Pipeline.** Overall, we have two phases, the  
014 pre-training phase and the fine-tuning phase. To provide  
015 clear pre-training phase of CSC, we summarize our frame-  
016 work in pseudo-code style as shown Algorithm 1. Then,  
017 we will introduce the implementation details of fine-tuning  
018 phase on three downstream perception tasks below.

#### 019 A.1. Semantic Segmentation and Object Detection

020 As done in previous works [2, 5], we choose MinkUNet as  
021 the 3D backbone and fine-tune the pre-trained MinkUNet to  
022 perform semantic segmentation task. For object detection,  
023 we use VoxelNet as the 3D backbone. The fine-tuning pro-  
024 cess on the two downstream tasks, semantic segmentation  
025 and object detection, is out of the scope of our contribution.  
026 Therefore, we recommend that readers refer to the paper  
027 and code in SLidR[5] for details of the implementation.

#### 028 A.2. Panoptic Segmentation by Cylinder3D

029 To the best of our knowledge, we are the first to report  
030 the results of fine-tuning the pre-trained 3D backbone on  
031 panoptic segmentation, where the backbone is obtained  
032 from the multi-modality pre-training. Considering that the  
033 off-the-shelf pipeline of pre-training and fine-tuning is not  
034 available, we draw lessons from the uni-modality point  
035 cloud pre-training work [3] and the study of panoptic seg-  
036 mentation method [8, 10], and finally choose the Panoptic-  
037 PolarNet [10] with Cylinder3D [11] as our panoptic seg-  
038 mentation network. Specifically, our panoptic segmentation  
039 network includes a 3D encoding network implemented by  
040 Cylinder3D, a 2D network implemented by UNet, and two  
041 heads for the prediction of semantic and instance. In the im-  
042 plementation, we use the LCPS [8] codebase, then remove  
043 the image branch to evaluate the 3D pre-training methods.

---

**Algorithm 1** Multi-Modality 3D Pre-Training Pipeline for our Coherent Semantic Cues Framework (CSC)

---

```

1: Input: (i) the point cloud frame  $\mathcal{P}$  and (ii) the surrounding
   images  $\mathcal{I}$ .
2: Backbones: (1) the 2D embedding network  $\Theta_I$ , (2) the 3D
   embedding network  $\Theta_P$ , and (3) the 2D mask network  $\Theta_F$ .
3: Loss: superpixel-superpoint contrastive loss  $\mathcal{L}_{sp}$  and
   prototype-based loss  $\mathcal{L}_{pro}$ .
4: Hyper-parameters: (a) the starting epoch of using prototype-
   based loss  $\lambda$ , (b) the temperature of superpixel-superpoint loss
    $\tau_{sp}$ , and (c) the temperature of prototype-based loss  $\tau_{pro}$ .
5: Pipeline:
6: Obtain superpixels  $\mathcal{S}_{2D}$  and semantic cues  $\mathcal{C}_{sem}$  from  $\mathcal{I}$  by
    $\Theta_F$ .
7: for  $n$  in 1:MaxEpochs do
8:   if  $n \bmod \lambda == 0$  then
9:     for  $i$  in 1:iterations do
10:      Extract 2D/3D features from  $\mathcal{I}/\mathcal{P}$  by  $\Theta_I/\Theta_P$ .
11:      According to 2D/3D features,  $\mathcal{S}_{2D}$ , and  $\mathcal{C}_{sem}$ , to pro-
12:      duce the superpixels & superpoints features  $\mathcal{F}_{2D}$  &
13:       $\mathcal{F}_{3D}$ .
14:      Maintain two separate prototype features  $\mathcal{P}_{2D}$  &  $\mathcal{P}_{3D}$ 
15:      by  $\mathcal{F}_{2D}$ ,  $\mathcal{F}_{3D}$ , and  $\mathcal{C}_{sem}$ .
16:       $\mathcal{P}_{2D} \xrightarrow{\text{Linear Layers}} \bar{\mathcal{P}}_{2D}$ ,
17:       $\mathcal{P}_{3D} \xrightarrow{\text{Linear Layers}} \bar{\mathcal{P}}_{3D}$ .
18:       $\{\bar{\mathcal{P}}_{2D}, \bar{\mathcal{P}}_{3D}\} \xrightarrow{\text{Linear Layers}} \mathcal{P}_{mix}$ .
19:     end for
20:   end if
21:   for  $i$  in 1:iterations do
22:     Extract 2D/3D features from  $\mathcal{I}/\mathcal{P}$  by  $\Theta_I/\Theta_P$ .
23:     According to 2D/3D features,  $\mathcal{S}_{2D}$ , and  $\mathcal{C}_{sem}$ , to generate
24:     the superpixels & superpoints features  $\mathcal{F}_{2D}$  &  $\mathcal{F}_{3D}$ .
25:      $\mathcal{L}_{sp} = -\sum_{i=0}^Q \log \frac{\exp(\langle \mathbf{F}_{3D}^i, \mathbf{F}_{2D}^i \rangle / \tau_{sp})}{\sum_{j=0}^Q \exp(\langle \mathbf{F}_{3D}^i, \mathbf{F}_{2D}^j \rangle / \tau_{sp})}$ 
26:     if  $n < \lambda$  then
27:        $\mathcal{L}_{total} = \mathcal{L}_{sp}$ .
28:     else
29:        $\mathcal{L}_{pro} = -\log \frac{\exp(\langle \mathbf{F}_{3D}, \mathbf{P}_{mix}^+ \rangle / \tau_{pro})}{\sum_{i=0}^{|\mathcal{C}_{sem}|} \exp(\langle \mathbf{F}_{3D}, \mathbf{P}_{mix}^i \rangle / \tau_{pro})}$ .
30:        $\mathcal{L}_{total} = \mathcal{L}_{sp} + \mathcal{L}_{pro}$ .
31:     end if
32:     Update  $\Theta_P$  by  $\mathcal{L}_{total}$ .
33:   end for
34: end for

```

---

### B. Complementary Results 044

#### B.1. Semantic segmentation result of 1% labels 045

046 To further detailed analysis in annotation-efficient semantic  
047 segmentation, we show the average per-class performance  
048 in Tab. 1. We observe that 3D representations learned

| Method         | barrier | bicycle    | bus         | car         | const. veh. | motorcycle  | pedestrian  | traffic cone | trailer     | truck       | driv. surf. | other flat  | sidewalk    | terrain     | manmade     | vegetation  | mIoU        |
|----------------|---------|------------|-------------|-------------|-------------|-------------|-------------|--------------|-------------|-------------|-------------|-------------|-------------|-------------|-------------|-------------|-------------|
| Random Init.   | 0.0     | 0.0        | 8.1         | 65.0        | 0.1         | 6.6         | 21.0        | 9.0          | 9.3         | 25.8        | 89.5        | 14.8        | 41.7        | 48.7        | 72.4        | 73.3        | 30.3        |
| Point Con. [6] | 0.0     | 1.0        | 5.6         | 67.4        | 0.0         | 3.3         | 31.6        | 5.6          | 12.1        | 30.8        | 91.7        | 21.9        | 48.4        | 50.8        | 75.0        | 74.6        | 32.5        |
| Depth Con. [7] | 0.0     | 0.6        | 6.5         | 64.7        | 0.2         | 5.1         | 29.0        | 9.5          | 12.1        | 29.9        | 90.3        | 17.8        | 44.4        | 49.5        | 73.5        | 74.0        | 31.7        |
| SLiDR [5]      | 0.0     | 3.1        | 15.2        | 72.0        | 0.9         | 18.8        | 43.2        | 12.5         | 14.7        | 33.3        | 92.8        | 29.4        | 54.0        | 61.0        | 80.2        | 81.9        | 38.3        |
| ST-SLiDR [2]   | 0.0     | 2.7        | 16.0        | 74.5        | 3.2         | 25.4        | 50.9        | 20.0         | 17.7        | 40.2        | 92.0        | 30.7        | 54.2        | 61.1        | 80.5        | 82.9        | 40.7        |
| TriCC [4]      | 0.0     | 2.6        | 20.7        | 73.6        | 0.3         | 18.9        | 49.2        | 22.0         | 16.9        | 33.4        | <b>94.5</b> | 43.1        | 57.2        | 62.1        | 82.3        | 82.6        | 41.2        |
| Seal [1]       | 0.0     | <b>9.4</b> | <b>32.6</b> | <b>77.5</b> | <b>10.4</b> | 28.0        | 53.0        | 25.0         | <b>30.9</b> | <b>49.7</b> | 94.0        | <b>33.7</b> | <b>60.1</b> | 59.6        | <b>83.9</b> | 83.4        | 45.8        |
| Ours           | 0.0     | 0.0        | <b>58.7</b> | 74.0        | 0.1         | <b>40.9</b> | <b>58.9</b> | <b>31.8</b>  | 23.7        | 45.1        | 92.5        | 33.0        | 56.4        | <b>62.4</b> | 81.6        | <b>84.2</b> | <b>47.0</b> |

Table 1. Per-class IoU on nuScenes when fine-tuning with 1% labels

by CSC significantly improve performance in the partial classes, such as bus, motorcycle, pedestrian, and traffic cone. Specifically, we observe a remarkable increase of  $\uparrow 26.1\%$  IoU for the bus class,  $\uparrow 12.9\%$  IoU for the motorcycle class, and  $\uparrow 5.9\%$  IoU for the pedestrian class, all of which are encompassed in the prototype semantics of the VFM (see Fig. 2). However, we observe a decrease in the IoUs for the construction vehicle, trailer, and truck categories, which we attribute to the fact that DINOv2 fine-tuned on the ADE20K dataset [9] misclassifies these three classes as the truck class. More specifically, This is because the categories in ADE20K and nuScenes do not match, while we employ DINOv2 fine-tuned on ADE20K during pre-training phase, which is misaligned with the 3D semantic label during fine-tuning phase. As shown in Fig. 1, we assign semantic labels to pixels via 3D semantic labels and 2D-3D relations, and find those pixels categorized as trucks by DINOv2 (c), which could be construction vehicle, trailer, or truck in nuScenes (b).

Nevertheless, our CSC framework still outperforms existing pre-training methods and outperforms the current SOTA method Seal by up to 1.2 mIoU. The above experimental results demonstrate that, compared to the existing 3D pre-training methods, our proposed CSC more effectively transfers 2D knowledge into the 3D network, thereby dramatically reducing the dependency on expensive 3D annotations.

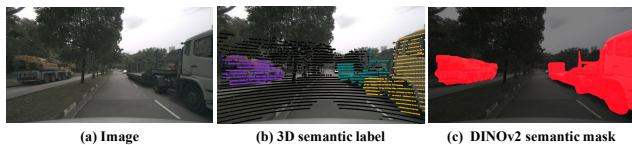

Figure 1. (a) an input image from nuScenes; (b) **const. veh.**, **trailer** and **truck** in DINOv2; (c) **truck** in nuScenes.

## B.2. More Image-LIDAR Datasets.

As shown in Tab. 2, we conduct more semantic segmentation experiments on ScribbleKITTI and SemanticSTF, and observe that our CSC outperform SOTA methods on these dataset.

| Method       | KITTI              | ScribbleKITTI (New) |                    | SemanticSTF (New)  |
|--------------|--------------------|---------------------|--------------------|--------------------|
|              | 1% (mIoU)          | 1% (mIoU)           | 10% (mIoU)         | 50% (mIoU)         |
| Random Init. | 39.5               | 23.8                | 47.6               | 48.0               |
| PPKT         | 44.0               | 36.5                | 51.7               | 50.9               |
| SLiDR        | 44.6               | 39.6                | 50.5               | 52.0               |
| Seal         | 46.6               | 40.6                | 52.8               | 53.5               |
| Ours (CSC)   | <b>47.2 (+0.6)</b> | <b>41.6 (+1.0)</b>  | <b>53.2 (+0.4)</b> | <b>53.8 (+0.3)</b> |

Table 2. CSC vs. previous methods on more datasets.

## B.3. More Ablation Study

In this section, we present experimental results on the impact of hyper-parameters (includes  $\lambda$ ,  $\tau_{pro}$  in semantic segmentation and the number of pre-training epochs in panoptic segmentation) and variants of using multi-modality prototype. Note that all experiments are performed on the nuScenes dataset.

**Study of  $\lambda$ .** As shown in Algorithm 1, we use  $\lambda$  to control the beginning epoch of using our proposed prototype-based loss. Meanwhile, the  $\lambda$  denotes the epoch interval of updating the mixed prototypes. We examine the influences of different  $\lambda$  and tabulate the results in Tab. 3. We observe that when we decrease  $\lambda$  (e.g.,  $10 \rightarrow 5 \rightarrow 2$ ), there is almost always exist a performance gain in all settings of different percentage labels. In addition, we list the GPU hour required for the pre-training phase at different  $\lambda$ . Considering the oversized hyper-parameter search space and the time cost of pre-training phase, we take 5 as the default value for  $\lambda$ . Also, this demonstrates the potential of using our CSC framework as the multi-modality pre-training baseline.

| $\lambda$ | GPU Hours | Semantic Seg. |      |             |      |
|-----------|-----------|---------------|------|-------------|------|
|           |           | 1%            | 5%   | 10%         | 25%  |
| 2         | 29 h      | 47.4          | 57.4 | 63.2        | 69.4 |
| 5         | 24 h      | 47.0          | 57.0 | <b>63.3</b> | 68.6 |
| 10        | 22 h      | 46.1          | 56.6 | 62.7        | 68.2 |

Table 3. Results (mIoU) of modifying the starting epoch  $\lambda$ . The row with the gray background represent our default value for  $\lambda$ .

**Study of  $\tau_{pro}$ .** In Tab. 4, we show the impact of various temperature  $\tau_{pro}$  in our prototype-based loss. The  $\tau_{pro}$  play a role in scaling the similarity scores between superpoint and prototype embeddings. According to the experimental results, we observe that the pre-trained 3D network achieves the best performance at three different labeling setting (1%, 10%, and 25%), when we set  $\tau_{pro}$  as 1.0. When  $\tau_{pro} = 2.0$ , the 3D network achieves the best result at 5% annotation.

| $\tau_{pro}$ | Semantic Seg. |             |             |             |
|--------------|---------------|-------------|-------------|-------------|
|              | 1%            | 5%          | 10%         | 25%         |
| 0.5          | 46.9          | 56.9        | 62.3        | 68.2        |
| 1.0          | <b>47.0</b>   | 57.0        | <b>63.3</b> | <b>68.6</b> |
| 1.5          | 45.7          | 56.7        | 62.0        | 67.3        |
| 2.0          | 46.0          | <b>58.4</b> | 62.8        | 68.1        |

Table 4. Results (mIoU) of modifying the prototype-based loss’s temperature  $\tau_{pro}$ . The row with the gray background represent our default value for  $\tau_{pro}$ .

**Study of the pre-training epoch.** In Tab. 5, we show the results about evaluation metrics of PQ, SQ, and RQ at different pre-training epoch, *i.e.*, 10, 20, and 30. We can observe that the PQ metric shows a steady upward trend when we increase the pre-training epoch. However, we find a counter-intuitive experimental phenomenon when observing SQ metric, which is that SQ at  $epoch = 10$  (74.0%) or 20 (74.5%) is significantly higher than SQ at  $epoch = 50$  (68.0%). To explore the reason behind such phenomenon, we compare the segmentation quality (SQ) metric and the SQ changes ( $\Delta$ ) for partial classes at  $epoch = 10$  and 50 in Tab. 6. From this table, we can clearly find that as the epoch increases, the 3D network’s semantic segmentation ability for bicycle class decreases significantly ( $\downarrow$  95.0% SQ), where the bicycle class is almost absent from the superpixel semantics obtained by DINOv2 (please refer to the semantic distribution of superpixel obtained from DINOv2 in Fig. 2).

| Pre-Training Epoch | Panoptic Segmentation |             |             |             |             |             |
|--------------------|-----------------------|-------------|-------------|-------------|-------------|-------------|
|                    | 1%                    |             |             | 5%          |             |             |
|                    | PQ                    | SQ          | RQ          | PQ          | SQ          | RQ          |
| 10                 | 18.5                  | 74.0        | 23.8        | 22.5        | 76.4        | 27.9        |
| 20                 | 19.3                  | <b>74.5</b> | 24.6        | 23.1        | <b>76.9</b> | 28.5        |
| 50                 | <b>19.7</b>           | 68.0        | <b>25.0</b> | <b>23.4</b> | 70.4        | <b>28.7</b> |

Table 5. Results (PQ, SQ, and RQ) of modifying the number of pre-training epoch. The row with the gray background represent the default number of pre-training epoch.

| Classes    | Epoch 10 (%) | Epoch 50 (%) | $\Delta$ (%)      |
|------------|--------------|--------------|-------------------|
| SQ         | 74.0         | 68.0         | $\downarrow$ 6.0  |
| bicycle    | 95.0         | 0.0          | $\downarrow$ 95.0 |
| bus        | 73.0         | 83.7         | $\uparrow$ 10.7   |
| car        | 82.3         | 86.9         | $\uparrow$ 4.6    |
| motorcycle | 90.3         | 81.3         | $\downarrow$ 9.0  |
| trailer    | 85.6         | 65.0         | $\downarrow$ 20.6 |

Table 6. Results for SQ and partial class-wise SQ on nuScenes, when fine-tuning the pre-trained 3D backbone to panoptic segmentation with 1% lables. We compare two experimental settings with epochs of 10 and 50, respectively.

**Study about variants of using multi-modality prototype.** In Tab. 5 of main paper, we have shown the two results of using only 3D prototypes and employing MMPB. To further analyze, we conduct more variants about how to utilize the multi-modality prototypes. Observing the results in Tab 7, we find that (1) simply using raw 2D/3D prototypes, including #1), #2), and #3), does not lead to performance improvement but rather to destructive effects; (2) When using our proposed MMPB #5) or the modified version of MMPB without Modality-Specific Prototype Projection #4), it significantly enhances the quality of the 3D pre-trained backbone and improves the performance on downstream task. The experimental results above demonstrate that our MMPB plays a key role in obtaining a high-quality 3D backbone, via effectively projecting and fusing 2D and 3D modality prototypes.

| #   | Variants          | Semantic Seg. |             |             |
|-----|-------------------|---------------|-------------|-------------|
|     |                   | 1%            | 5%          | 10%         |
| (1) | 2D Prototype      | 40.3          | 54.5        | 61.1        |
| (2) | 3D Prototype      | 40.3          | 53.3        | 60.5        |
| (3) | 2D Pro. + 3D Pro. | 41.5          | 54.2        | 60.7        |
| (4) | MMPB w/o Proj.    | 45.7          | 56.7        | 62.7        |
| (5) | MMPB              | <b>47.0</b>   | <b>57.0</b> | <b>63.3</b> |

Table 7. Results (mIoU) of diverse variants of using multi-modality prototypes. #1), #2), and #3) are three straightforward ways that employing raw 2D/3D prototypes. #4) is the modified MMPB version without Modality-Specific Prototype Projection. #5) denotes our complete MMPB.

#### B.4. 2D/3D Prototype Generation

. Here, we try other ways than average operation for generating 2D/3D prototypes. In Tab. 8, we try more operations on nuScenes, and observe that average operation is the best.

| #   | Operation         | 1% (mIoU)   | 5% (mIoU)   | 10% (mIoU)  |
|-----|-------------------|-------------|-------------|-------------|
| (1) | Average (Default) | <b>47.0</b> | <b>57.0</b> | <b>63.3</b> |
| (2) | Max               | 46.7        | 56.7        | 62.2        |
| (3) | Sum               | 14.2        | 16.6        | 18.6        |

Table 8. Results of three operations for prototype generation

## 147 B.5. Semantic Distribution of superpixel

148 To explore the superpixels generated by the VFM (DI-  
149 NOV2), we provide both a pie chart and a statistical ta-  
150 ble of the semantic distribution of superpixels in Fig. 2.  
151 We observe that only one-third of the superpixels, which  
152 are generated by DINOv2 and located within the view of  
153 point cloud, are relevant to our desired autonomous driv-  
154 ing scenarios. Despite having only these related seman-  
155 tic categories, *i.e.*, scene-relevant semantic prototypes, our  
156 CSC model also achieves consistency enhancement of the  
157 3D pre-trained model for the three downstream tasks. This  
158 result states that VFM-Assisted Semantic Prototype Gen-  
159 eration and Coherent Semantic Consistency are effective  
160 in building a strong pre-training baseline for universal 3D  
161 large-scale perception.

## 162 C. Public Resources Used

163 We acknowledge the use of the following public resources,  
164 during the course of this work:

- 165 • nuScenes<sup>1</sup> ..... CC BY-NC-SA 4.0
- 166 • nuScenes-devkit<sup>2</sup> ..... Apache License 2.0
- 167 • SemanticKITTI<sup>3</sup> ..... CC BY-NC-SA 4.0
- 168 • MinkowskiEngine<sup>4</sup> ..... MIT License
- 169 • SLiDR<sup>5</sup> ..... Apache License 2.0
- 170 • Cylinder3D<sup>6</sup> ..... Apache License 2.0
- 171 • PyTorch-Lightning<sup>7</sup> ..... Apache License 2.0
- 172 • OpenPCDet<sup>8</sup> ..... Apache License 2.0
- 173 • DINOv2<sup>9</sup> ..... Apache License 2.0
- 174 • OneFormer<sup>10</sup> ..... MIT License
- 175 • SpConv<sup>11</sup> ..... Apache License 2.0

## 176 References

- 177 [1] Youquan Liu, Lingdong Kong, Jun Cen, Runnan Chen, Wen-  
178 wei Zhang, Liang Pan, Kai Chen, and Ziwei Liu. Segment  
179 any point cloud sequences by distilling vision foundation  
180 models. *arXiv preprint arXiv:2306.09347*, 2023. 2
- 181 [2] Anas Mahmoud, Jordan SK Hu, Tianshu Kuai, Ali Harakeh,  
182 Liam Paull, and Steven L Waslander. Self-supervised image-  
183 to-point distillation via semantically tolerant contrastive loss.  
184 In *Proceedings of the IEEE/CVF Conference on Computer*  
185 *Vision and Pattern Recognition*, pages 7102–7110, 2023. 1,  
186 2

- [3] Lucas Nunes, Louis Wiesmann, Rodrigo Marcuzzi,  
Xieyuanli Chen, Jens Behley, and Cyrill Stachniss. Tempo-  
ral consistent 3d lidar representation learning for semantic  
perception in autonomous driving. In *Proceedings of the*  
*IEEE/CVF Conference on Computer Vision and Pattern*  
*Recognition*, pages 5217–5228, 2023. 1 187  
188  
189  
190  
191  
192
- [4] Bo Pang, Hongchi Xia, and Cewu Lu. Unsupervised 3d  
point cloud representation learning by triangle constrained  
contrast for autonomous driving. In *Proceedings of the*  
*IEEE/CVF Conference on Computer Vision and Pattern*  
*Recognition*, pages 5229–5239, 2023. 2 193  
194  
195  
196  
197
- [5] Corentin Sautier, Gilles Puy, Spyros Gidaris, Alexandre  
Boulch, Andrei Bursuc, and Renaud Marlet. Image-to-lidar  
self-supervised distillation for autonomous driving data. In  
*Proceedings of the IEEE/CVF Conference on Computer Vi-*  
*sion and Pattern Recognition*, pages 9891–9901, 2022. 1,  
2 198  
199  
200  
201  
202  
203
- [6] Saining Xie, Jiatao Gu, Demi Guo, Charles R Qi, Leonidas  
Guibas, and Or Litany. Pointcontrast: Unsupervised pre-  
training for 3d point cloud understanding. In *Computer*  
*Vision—ECCV 2020: 16th European Conference, Glasgow,*  
*UK, August 23–28, 2020, Proceedings, Part III 16*, pages  
574–591. Springer, 2020. 2 204  
205  
206  
207  
208  
209
- [7] Zaiwei Zhang, Rohit Girdhar, Armand Joulin, and Ishan  
Misra. Self-supervised pretraining of 3d features on any  
point-cloud. In *Proceedings of the IEEE/CVF International*  
*Conference on Computer Vision*, pages 10252–10263, 2021.  
2 210  
211  
212  
213  
214
- [8] Zhiwei Zhang, Zhizhong Zhang, Qian Yu, Ran Yi, Yuan  
Xie, and Lizhuang Ma. Lidar-camera panoptic segmenta-  
tion via geometry-consistent and semantic-aware alignment.  
In *Proceedings of the IEEE/CVF International Conference*  
*on Computer Vision (ICCV)*, pages 3662–3671, 2023. 1 215  
216  
217  
218  
219
- [9] Bolei Zhou, Hang Zhao, Xavier Puig, Tete Xiao, Sanja Fid-  
ler, Adela Barriuso, and Antonio Torralba. Semantic under-  
standing of scenes through the ade20k dataset. *International*  
*Journal of Computer Vision*, 127(3):302–321, 2019. 2, 5 220  
221  
222  
223  
224
- [10] Zixiang Zhou, Yang Zhang, and Hassan Foroosh. Panoptic-  
polarnet: Proposal-free lidar point cloud panoptic segmenta-  
tion. In *Proceedings of the IEEE/CVF Conference on Com-*  
*puter Vision and Pattern Recognition*, pages 13194–13203,  
2021. 1 225  
226  
227  
228
- [11] Xinge Zhu, Hui Zhou, Tai Wang, Fangzhou Hong, Yuexin  
Ma, Wei Li, Hongsheng Li, and Dahua Lin. Cylindrical  
and asymmetrical 3d convolution networks for lidar seg-  
mentation. In *Proceedings of the IEEE/CVF conference on*  
*computer vision and pattern recognition*, pages 9939–9948,  
2021. 1 229  
230  
231  
232  
233  
234

<sup>1</sup><https://www.nuscenes.org/nuscenes>

<sup>2</sup><https://github.com/nuonomy/nuscenes-devkit>

<sup>3</sup><http://semantic-kitti.org>

<sup>4</sup><https://github.com/NVIDIA/MinkowskiEngine>

<sup>5</sup><https://github.com/valeoai/SLiDR>

<sup>6</sup><https://github.com/xinge008/Cylinder3D>

<sup>7</sup><https://github.com/Lightning-AI/lightning>

<sup>8</sup><https://github.com/open-mmlab/OpenPCDet>

<sup>9</sup><https://github.com/facebookresearch/dinov2>

<sup>10</sup><https://github.com/SHI-Labs/OneFormer>

<sup>11</sup><https://github.com/traveller59/spconv>

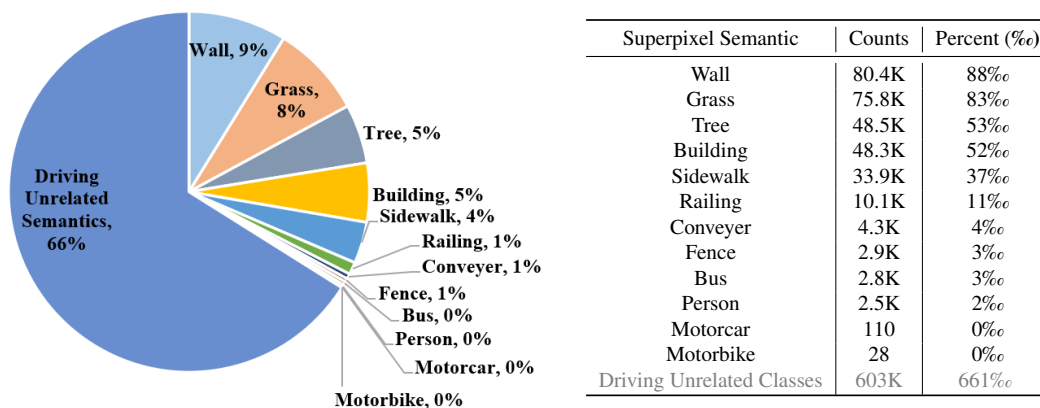

Figure 2. Semantic classes and number of superpixels generated by DINOv2 on the nuScenes dataset. We provide both the pie chart (left half) and the statistical table (right half) to present the semantic distribution of the superpixels. Note that since we use DINOv2 fine-tuned on the ADE20K dataset [9], the network classifies each superpixel in 150 categories, most of which are categories that are unrelated to autonomous driving scenes, such as bed, bench, book, etc. We denote these classes as Driving Unrelated Semantics, which amounted to 603K and accounted for 661% of the total.
